# Supplementary material for: The dynamical temporal behaviors of guanine–cytosine coherent charge transfer
Source: Royal Society of Chemistry journal article supplement (doi:10.1039/d3cp00281k), 2023-01-01
Supplement: d3cp00281k2.pdf [file d3cp00281k2.pdf]

## Supporting Information

### The dynamical temporal behaviors of guanine-cytosine coherent charge transfer

Lixia Zhu<sup>1</sup>, Qiao Zhou<sup>1</sup>, Yongfeng Wan<sup>1</sup>, Qi Li<sup>1</sup>, Yu Wan<sup>1</sup>, Hang Yin<sup>1</sup> and Ying Shi\*<sup>1</sup>

<sup>1</sup>Institute of Atomic and Molecular Physics, Jilin University, Changchun 130012, China

Email: [shi\\_ying@jlu.edu.cn](mailto:shi_ying@jlu.edu.cn)

Test calculations on the donor-acceptor complex using different functionals and basis sets to assess the validity of the computational approach used.

**Table S1** With the same basis set (TZVP), the maximum absorption peak of G-C was calculated by different functionals.

|     | B3LYP  | CAM-B3LYP | PBEPBE | mPW1PW191 | $\omega$ B97XD | Exp <sup>a</sup> . |
|-----|--------|-----------|--------|-----------|----------------|--------------------|
| G-C | 259 nm | 221 nm    | 344 nm | 235 nm    | 221 nm         | 260 nm             |

**Table S2** With the same functional (B3LYP), the maximum absorption peak of G-C was calculated using different basis sets.

|     | TZVP   | 6-311++G (d) | 6-31G (d,p) | cc-pVTZz | aug-cc-pVTZ | Exp <sup>a</sup> . |
|-----|--------|--------------|-------------|----------|-------------|--------------------|
| G-C | 259 nm | 258 nm       | 251 nm      | 252 nm   | 262 nm      | 260 nm             |

<sup>a</sup> Literature: [Miannay et al. *J. Am. Chem. Soc.*, 2007, 129, 14574-14575], [Lin et al. *J. Phys. Chem. B.*, 2015, 119, 25, 7994-8000] and [Banyasz et al. *Phys. Chem. Chem. Phys.*, 2018, 20, 21381].

**Table S3** The oscillator strengths ( $f$ ) of G-C under different excited states (B3LYP/TZVP).

---

|     | S <sub>1</sub> | S <sub>2</sub> | S <sub>3</sub> | S <sub>4</sub> | S <sub>5</sub> |
|-----|----------------|----------------|----------------|----------------|----------------|
| $f$ | 0.0016         | 0.0082         | 0.0002         | 0.0959         | 0.0336         |

---

**Table S4** The energy of photoexcitation from HOMO to LUMO+2 (B3LYP/TZVP).

---

|               | HOMO  | LUMO  | LUMO+1 | LUMO+2 |
|---------------|-------|-------|--------|--------|
| Energy (a.u.) | 0.185 | 0.043 | 0.007  | 0.010  |

---
